# Supplementary material for: Exploring the structure–composition phase space of lithium borocarbide, LixBC for x ≤ 1
Source: Royal Society of Chemistry journal article supplement (doi:10.1039/c3ra41396a), 2013-01-01
Supplement: c3ra41396a.pdf [file c3ra41396a.pdf]

# Exploring the structure-composition phase space of lithium borocarbide, $\text{Li}_x\text{BC}$ for $x \leq 1$

Riccarda Caputo \*

April 22, 2013

## Abstract

The following Supplementary Information contains detailed lists of the calculated reflections of the  $\text{Li}_x\text{BC}$  structures reported in the X-ray diffraction peaks, Figure.7 and corresponding to those listed in Table.1. Miller indices ( $h k l$ ), interplanar spacing ( $d_{hkl}$  in Å), diffraction angles ( $2\theta^\circ$ ) and the relative intensity of the diffraction peaks ( $I/I_{max}$ ) are reported.

## 1 X-ray diffraction peaks

The X-ray calculations were performed by using *Reflex Power Diffraction* module implemented in Materials Studio6.0. In particular, the following settings were used:

Cu radiation with  $\lambda_1 = 1.540562$  Å

anomalous dispersion included

monochromator single  $d_{hkl} = 1.00$  Å and angle = 50.370129 degrees

Profile: Pseudo-Voigt peak shape function

Temperature factor atomic and anisotropic for all three species, Li, B, C.

### 1.1 $x = 1$ , LiBC

The calculated reflections of LiBC hexagonal structure, symmetry space group  $P6_3/mmc$  (No 194) and lattice parameters  $a$ ,  $c$  equal to 2.730 Å, 6.957 Å.

| h | k  | l | $d_{hkl}$ | $2\theta$ | $I/I_{max}$ |
|---|----|---|-----------|-----------|-------------|
| 0 | 0  | 2 | 3.478     | 25.588    | 100         |
| 1 | -1 | 0 | 2.364     | 38.026    | 2.38        |
| 0 | 1  | 0 | 2.364     | 38.026    | 2.38        |
| 1 | 0  | 0 | 2.364     | 38.026    | 2.38        |

\*ETH, Swiss Federal Institute of Technology, Department of Chemistry and Applied Biosciences, Institute of Inorganic Chemistry, Wolfgang-Pauli Strasse 10, CH-8093 Zürich, E-mail: riccarda.caputo@inorg.chem.ethz.ch

|   |    |    |       |        |       |
|---|----|----|-------|--------|-------|
| 1 | -1 | 1  | 2.239 | 40.252 | 0.56  |
| 1 | -1 | -1 | 2.239 | 40.252 | 0.56  |
| 0 | 1  | 1  | 2.239 | 40.252 | 0.56  |
| 0 | 1  | -1 | 2.239 | 40.252 | 0.56  |
| 1 | 0  | 1  | 2.239 | 40.252 | 0.56  |
| 1 | 0  | -1 | 2.239 | 40.252 | 0.56  |
| 1 | -1 | -2 | 1.955 | 46.397 | 15.72 |
| 1 | -1 | 2  | 1.955 | 46.397 | 15.72 |
| 0 | 1  | 2  | 1.955 | 46.397 | 15.72 |
| 0 | 1  | -2 | 1.955 | 46.397 | 15.72 |
| 1 | 0  | 2  | 1.955 | 46.397 | 15.72 |
| 1 | 0  | -2 | 1.955 | 46.397 | 15.72 |
| 0 | 0  | 4  | 1.739 | 52.576 | 27.25 |
| 1 | -1 | -3 | 1.656 | 55.454 | 0.13  |
| 1 | -1 | 3  | 1.656 | 55.454 | 0.13  |
| 0 | 1  | 3  | 1.656 | 55.454 | 0.13  |
| 0 | 1  | -3 | 1.656 | 55.454 | 0.13  |
| 1 | 0  | 3  | 1.656 | 55.454 | 0.13  |
| 1 | 0  | -3 | 1.656 | 55.454 | 0.13  |
| 1 | -1 | 4  | 1.401 | 66.707 | 0.21  |
| 1 | -1 | -4 | 1.401 | 66.707 | 0.21  |
| 0 | 1  | -4 | 1.401 | 66.707 | 0.21  |
| 0 | 1  | 4  | 1.401 | 66.707 | 0.21  |
| 1 | 0  | 4  | 1.401 | 66.707 | 0.21  |
| 1 | 0  | -4 | 1.401 | 66.707 | 0.21  |
| 1 | -2 | 0  | 1.365 | 68.704 | 12.53 |
| 2 | -1 | 0  | 1.365 | 68.704 | 12.53 |
| 1 | 1  | 0  | 1.365 | 68.704 | 12.53 |
| 1 | -2 | -2 | 1.271 | 74.627 | 2.62  |
| 1 | -2 | 2  | 1.271 | 74.627 | 2.62  |
| 2 | -1 | 2  | 1.271 | 74.627 | 2.62  |
| 2 | -1 | -2 | 1.271 | 74.627 | 2.62  |
| 1 | 1  | 2  | 1.271 | 74.627 | 2.62  |
| 1 | 1  | -2 | 1.271 | 74.627 | 2.62  |
| 1 | -1 | -5 | 1.199 | 79.935 | 0.02  |
| 1 | -1 | 5  | 1.199 | 79.935 | 0.02  |
| 0 | 1  | -5 | 1.199 | 79.935 | 0.02  |
| 0 | 1  | 5  | 1.199 | 79.935 | 0.02  |
| 1 | 0  | 5  | 1.199 | 79.935 | 0.02  |
| 1 | 0  | -5 | 1.199 | 79.935 | 0.02  |
| 2 | -2 | 0  | 1.182 | 81.321 | 0.16  |
| 0 | 2  | 0  | 1.182 | 81.321 | 0.16  |
| 2 | 0  | 0  | 1.182 | 81.321 | 0.16  |
| 2 | -2 | -1 | 1.165 | 82.739 | 0.02  |
| 2 | -2 | 1  | 1.165 | 82.739 | 0.02  |
| 0 | 2  | -1 | 1.165 | 82.739 | 0.02  |
| 0 | 2  | 1  | 1.165 | 82.739 | 0.02  |
| 2 | 0  | -1 | 1.165 | 82.739 | 0.02  |
| 2 | 0  | 1  | 1.165 | 82.739 | 0.02  |

|   |    |    |       |        |      |
|---|----|----|-------|--------|------|
| 0 | 0  | 6  | 1.159 | 83.261 | 1.93 |
| 2 | -2 | -2 | 1.119 | 86.972 | 2.64 |
| 2 | -2 | 2  | 1.119 | 86.972 | 2.64 |
| 0 | 2  | 2  | 1.119 | 86.972 | 2.64 |
| 0 | 2  | -2 | 1.119 | 86.972 | 2.64 |
| 2 | 0  | 2  | 1.119 | 86.972 | 2.64 |
| 2 | 0  | -2 | 1.119 | 86.972 | 2.64 |

## 1.2 $x = 0.875$

The calculated reflections of trigonal  $\text{Li}_{0.875}\text{BC}$ , symmetry space group  $P\bar{3}_1$  (No 164) and lattice parameters  $a$ ,  $c$  equal to 5.437 Å, 6.987 Å.

| h | k | l  | $d_{hkl}$ | $2\theta$ | $I/I_{max}$ |
|---|---|----|-----------|-----------|-------------|
| 0 | 0 | 1  | 6.987     | 12.659    | 1.05        |
| 1 | 0 | 0  | 4.708     | 18.832    | 0.86        |
| 1 | 0 | 1  | 3.904     | 22.756    | 0.74        |
| 1 | 0 | -1 | 3.904     | 22.756    | 0.56        |
| 0 | 0 | 2  | 3.493     | 25.476    | 100.00      |
| 1 | 0 | 2  | 2.806     | 31.872    | 0.09        |
| 1 | 0 | -2 | 2.806     | 31.872    | 0.64        |
| 1 | 1 | 0  | 2.718     | 32.923    | 0.23        |
| 1 | 1 | 1  | 2.533     | 35.403    | 0.37        |
| 2 | 0 | 0  | 2.354     | 38.199    | 7.87        |
| 0 | 0 | 3  | 2.329     | 38.627    | 0.05        |
| 2 | 0 | 1  | 2.231     | 40.398    | 2.49        |
| 2 | 0 | -1 | 2.231     | 40.398    | 0.70        |
| 1 | 1 | 2  | 2.145     | 42.083    | 0.25        |
| 1 | 0 | 3  | 2.088     | 43.307    | 0.10        |
| 1 | 0 | -3 | 2.088     | 43.307    | 0.12        |
| 2 | 0 | 2  | 1.952     | 46.478    | 38.38       |
| 2 | 0 | -2 | 1.952     | 46.478    | 36.46       |
| 2 | 1 | 0  | 1.780     | 51.298    | 0.19        |
| 1 | 1 | 3  | 1.769     | 51.638    | 0.16        |
| 0 | 0 | 4  | 1.747     | 52.333    | 22.57       |
| 2 | 1 | -1 | 1.724     | 53.061    | 0.17        |
| 2 | 1 | 1  | 1.724     | 53.061    | 0.11        |
| 2 | 0 | 3  | 1.656     | 55.452    | 0.11        |
| 2 | 0 | -3 | 1.656     | 55.452    | 0.68        |
| 1 | 0 | 4  | 1.638     | 56.115    | 0.16        |
| 2 | 1 | 2  | 1.586     | 58.127    | 0.02        |
| 2 | 1 | -2 | 1.586     | 58.127    | 0.16        |
| 3 | 0 | 0  | 1.569     | 58.788    | 0.05        |
| 3 | 0 | 1  | 1.531     | 60.403    | 0.02        |
| 3 | 0 | -1 | 1.531     | 60.403    | 0.08        |
| 1 | 1 | 4  | 1.469     | 63.226    | 0.08        |
| 3 | 0 | 2  | 1.432     | 65.104    | 0.04        |
| 3 | 0 | -2 | 1.432     | 65.104    | 0.04        |
| 2 | 1 | 3  | 1.414     | 66.015    | 0.08        |
| 2 | 1 | -3 | 1.414     | 66.015    | 0.05        |
| 2 | 0 | 4  | 1.403     | 66.613    | 0.83        |
| 2 | 0 | -4 | 1.403     | 66.613    | 0.55        |
| 0 | 0 | 5  | 1.397     | 66.903    | 0.01        |
| 2 | 2 | 0  | 1.359     | 69.046    | 27.90       |
| 1 | 0 | 5  | 1.340     | 70.199    | 0.03        |
| 1 | 0 | -5 | 1.340     | 70.199    | 0.03        |
| 2 | 2 | 1  | 1.334     | 70.530    | 0.06        |

|   |   |    |       |        |       |
|---|---|----|-------|--------|-------|
| 3 | 1 | 0  | 1.306 | 72.297 | 0.05  |
| 3 | 0 | 3  | 1.301 | 72.576 | 0.05  |
| 3 | 0 | -3 | 1.301 | 72.576 | 0.01  |
| 3 | 1 | -1 | 1.284 | 73.753 | 0.06  |
| 3 | 1 | 1  | 1.284 | 73.753 | 0.05  |
| 2 | 2 | 2  | 1.267 | 74.907 | 12.40 |
| 2 | 1 | 4  | 1.247 | 76.329 | 0.17  |
| 2 | 1 | -4 | 1.247 | 76.329 | 0.01  |
| 1 | 1 | 5  | 1.243 | 76.603 | 0.04  |
| 3 | 1 | 2  | 1.223 | 78.062 | 0.09  |
| 3 | 1 | -2 | 1.223 | 78.062 | 0.02  |
| 2 | 0 | 5  | 1.202 | 79.737 | 0.12  |
| 4 | 0 | 0  | 1.177 | 81.750 | 0.40  |
| 2 | 2 | 3  | 1.174 | 82.019 | 0.04  |
| 3 | 0 | 4  | 1.167 | 82.572 | 0.02  |
| 3 | 0 | -4 | 1.167 | 82.572 | 0.02  |
| 0 | 0 | 6  | 1.164 | 82.825 | 1.58  |
| 4 | 0 | -1 | 1.161 | 83.155 | 0.10  |
| 3 | 1 | 3  | 1.139 | 85.106 | 0.04  |
| 3 | 1 | -3 | 1.139 | 85.106 | 0.03  |
| 1 | 0 | -6 | 1.130 | 85.908 | 0.08  |
| 4 | 0 | 2  | 1.115 | 87.349 | 5.32  |
| 4 | 0 | -2 | 1.115 | 87.349 | 5.59  |
| 2 | 1 | 5  | 1.099 | 88.994 | 0.02  |
| 2 | 1 | -5 | 1.099 | 88.994 | 0.04  |

### 1.3 $x = 0.750$

The calculated reflections of orthorhombic  $\text{Li}_{0.750}\text{BC}$ , symmetry space group  $Cmcm$  (No 63) and lattice parameters  $a$ ,  $b$ ,  $c$  equal to 5.424 Å, 9.393 Å, 6.981 Å.

| h | k | l | $d_{hkl}$ | $2\theta$ | $I/I_{max}$ |
|---|---|---|-----------|-----------|-------------|
| 1 | 1 | 0 | 4.697     | 18.876    | 2.15        |
| 0 | 2 | 0 | 4.697     | 18.878    | 1.08        |
| 1 | 1 | 1 | 3.897     | 22.800    | 0.01        |
| 0 | 2 | 1 | 3.897     | 22.801    | 0.01        |
| 0 | 0 | 2 | 3.490     | 25.500    | 100.00      |
| 1 | 1 | 2 | 2.802     | 31.918    | 1.48        |
| 0 | 2 | 2 | 2.801     | 31.919    | 0.74        |
| 2 | 0 | 0 | 2.712     | 33.001    | 0.29        |
| 1 | 3 | 0 | 2.712     | 33.004    | 0.57        |
| 2 | 2 | 0 | 2.349     | 38.291    | 6.27        |
| 0 | 4 | 0 | 2.348     | 38.294    | 3.15        |
| 2 | 2 | 1 | 2.226     | 40.490    | 1.81        |
| 0 | 4 | 1 | 2.226     | 40.493    | 0.88        |
| 2 | 0 | 2 | 2.142     | 42.162    | 0.31        |
| 1 | 3 | 2 | 2.141     | 42.164    | 0.62        |
| 2 | 2 | 2 | 1.949     | 46.571    | 41.40       |
| 0 | 4 | 2 | 1.948     | 46.573    | 20.75       |
| 3 | 1 | 0 | 1.775     | 51.425    | 0.23        |
| 2 | 4 | 0 | 1.775     | 51.428    | 0.23        |
| 1 | 5 | 0 | 1.775     | 51.430    | 0.23        |
| 0 | 0 | 4 | 1.745     | 52.385    | 19.62       |
| 2 | 2 | 3 | 1.653     | 55.549    | 0.42        |
| 0 | 4 | 3 | 1.653     | 55.552    | 0.20        |
| 1 | 1 | 4 | 1.636     | 56.181    | 0.25        |
| 0 | 2 | 4 | 1.636     | 56.182    | 0.12        |
| 3 | 1 | 2 | 1.582     | 58.255    | 0.19        |
| 2 | 4 | 2 | 1.582     | 58.258    | 0.19        |
| 1 | 5 | 2 | 1.582     | 58.260    | 0.19        |
| 3 | 3 | 0 | 1.566     | 58.938    | 0.12        |
| 0 | 6 | 0 | 1.566     | 58.943    | 0.06        |
| 3 | 3 | 1 | 1.528     | 60.554    | 0.02        |
| 0 | 6 | 1 | 1.528     | 60.559    | 0.01        |
| 2 | 0 | 4 | 1.468     | 63.319    | 0.10        |
| 1 | 3 | 4 | 1.468     | 63.321    | 0.20        |
| 3 | 3 | 2 | 1.429     | 65.257    | 0.18        |
| 0 | 6 | 2 | 1.428     | 65.262    | 0.09        |
| 2 | 2 | 4 | 1.401     | 66.720    | 1.26        |
| 0 | 4 | 4 | 1.401     | 66.722    | 0.64        |
| 4 | 0 | 0 | 1.356     | 69.228    | 7.98        |
| 2 | 6 | 0 | 1.356     | 69.234    | 15.96       |
| 4 | 2 | 0 | 1.303     | 72.491    | 0.06        |
| 3 | 5 | 0 | 1.303     | 72.494    | 0.06        |
| 1 | 7 | 0 | 1.303     | 72.499    | 0.06        |

|   |   |   |       |        |      |
|---|---|---|-------|--------|------|
| 3 | 3 | 3 | 1.299 | 72.735 | 0.01 |
| 0 | 6 | 3 | 1.299 | 72.740 | 0.01 |
| 4 | 0 | 2 | 1.264 | 75.094 | 4.30 |
| 2 | 6 | 2 | 1.264 | 75.100 | 8.59 |
| 3 | 1 | 4 | 1.245 | 76.473 | 0.15 |
| 2 | 4 | 4 | 1.245 | 76.476 | 0.15 |
| 1 | 5 | 4 | 1.245 | 76.477 | 0.15 |
| 4 | 2 | 2 | 1.221 | 78.261 | 0.12 |
| 3 | 5 | 2 | 1.221 | 78.265 | 0.12 |
| 1 | 7 | 2 | 1.220 | 78.269 | 0.12 |
| 2 | 2 | 5 | 1.200 | 79.860 | 0.05 |
| 0 | 4 | 5 | 1.200 | 79.862 | 0.02 |
| 4 | 4 | 0 | 1.174 | 81.982 | 0.37 |
| 0 | 8 | 0 | 1.174 | 81.990 | 0.18 |
| 3 | 3 | 4 | 1.165 | 82.743 | 0.09 |
| 0 | 6 | 4 | 1.165 | 82.748 | 0.05 |
| 0 | 0 | 6 | 1.163 | 82.918 | 1.67 |
| 4 | 4 | 1 | 1.158 | 83.388 | 0.04 |
| 0 | 8 | 1 | 1.158 | 83.397 | 0.02 |
| 1 | 1 | 6 | 1.129 | 86.014 | 0.09 |
| 0 | 2 | 6 | 1.129 | 86.014 | 0.05 |
| 4 | 4 | 2 | 1.113 | 87.588 | 6.01 |
| 0 | 8 | 2 | 1.113 | 87.596 | 2.99 |

## 1.4 $x = 0.625$

The calculated reflections of the monoclinic  $\text{Li}_{0.625}\text{BC}$  structure, symmetry space group  $C2/m$  (No 12) and lattice parameters  $a, b, c, \beta$  equal to 9.349 Å, 5.418 Å, 6.972 Å, 90.848°.

| h | k | l  | $d_{hkl}$ | $2\theta$ | $I/I_{max}$ |
|---|---|----|-----------|-----------|-------------|
| 0 | 0 | 1  | 6.972     | 12.687    | 0.83        |
| 1 | 1 | -1 | 4.688     | 18.915    | 0.50        |
| 2 | 0 | -2 | 4.674     | 18.972    | 2.28        |
| 2 | 0 | -1 | 3.909     | 22.729    | 0.26        |
| 1 | 1 | 0  | 3.904     | 22.762    | 0.41        |
| 1 | 1 | -2 | 3.877     | 22.921    | 0.32        |
| 2 | 0 | -3 | 3.856     | 23.047    | 0.12        |
| 0 | 0 | 2  | 3.486     | 25.533    | 100.00      |
| 2 | 0 | 0  | 2.814     | 31.770    | 0.39        |
| 1 | 1 | 1  | 2.807     | 31.852    | 0.05        |
| 1 | 1 | -3 | 2.787     | 32.086    | 0.36        |
| 2 | 0 | -4 | 2.775     | 32.236    | 1.23        |
| 0 | 2 | 0  | 2.709     | 33.037    | 0.61        |
| 3 | 1 | -3 | 2.701     | 33.138    | 0.13        |
| 3 | 1 | -2 | 2.530     | 35.456    | 0.11        |
| 0 | 2 | 1  | 2.525     | 35.521    | 0.11        |
| 3 | 1 | -4 | 2.508     | 35.775    | 0.11        |
| 2 | 2 | -2 | 2.344     | 38.372    | 7.09        |
| 4 | 0 | -4 | 2.337     | 38.490    | 3.92        |
| 0 | 0 | 3  | 2.324     | 38.716    | 0.05        |
| 2 | 2 | -1 | 2.227     | 40.478    | 0.46        |
| 4 | 0 | -3 | 2.226     | 40.496    | 0.59        |
| 2 | 2 | -3 | 2.217     | 40.668    | 1.55        |
| 4 | 0 | -5 | 2.206     | 40.875    | 0.13        |
| 3 | 1 | -1 | 2.149     | 42.019    | 0.07        |
| 0 | 2 | 2  | 2.139     | 42.213    | 0.65        |
| 3 | 1 | -5 | 2.122     | 42.570    | 0.07        |
| 2 | 0 | 1  | 2.093     | 43.183    | 0.02        |
| 1 | 1 | 2  | 2.088     | 43.292    | 0.06        |
| 1 | 1 | -4 | 2.076     | 43.561    | 0.07        |
| 2 | 0 | -5 | 2.069     | 43.722    | 0.04        |
| 4 | 0 | -2 | 1.955     | 46.420    | 9.33        |
| 2 | 2 | 0  | 1.952     | 46.489    | 16.63       |
| 2 | 2 | -4 | 1.938     | 46.829    | 17.21       |
| 4 | 0 | -6 | 1.928     | 47.099    | 8.37        |
| 1 | 3 | -1 | 1.773     | 51.491    | 0.05        |
| 3 | 1 | 0  | 1.773     | 51.504    | 0.05        |
| 4 | 2 | -4 | 1.770     | 51.609    | 0.47        |
| 5 | 1 | -5 | 1.767     | 51.679    | 0.06        |
| 0 | 2 | 3  | 1.764     | 51.788    | 0.05        |
| 3 | 1 | -6 | 1.751     | 52.211    | 0.04        |
| 0 | 0 | 4  | 1.743     | 52.458    | 16.94       |



|   |   |    |       |        |       |
|---|---|----|-------|--------|-------|
| 4 | 2 | -3 | 1.720 | 53.218 | 0.06  |
| 1 | 3 | 0  | 1.720 | 53.219 | 0.03  |
| 5 | 1 | -4 | 1.719 | 53.248 | 0.05  |
| 1 | 3 | -2 | 1.717 | 53.296 | 0.04  |
| 4 | 2 | -5 | 1.711 | 53.526 | 0.02  |
| 5 | 1 | -6 | 1.707 | 53.633 | 0.03  |
| 4 | 0 | -1 | 1.660 | 55.289 | 0.02  |
| 2 | 2 | 1  | 1.656 | 55.425 | 0.42  |
| 2 | 2 | -5 | 1.644 | 55.874 | 0.08  |
| 2 | 0 | 2  | 1.641 | 55.990 | 0.31  |
| 1 | 1 | 3  | 1.638 | 56.117 | 0.10  |
| 4 | 0 | -7 | 1.636 | 56.186 | 0.15  |
| 2 | 0 | -6 | 1.625 | 56.584 | 0.03  |
| 5 | 1 | -3 | 1.585 | 58.143 | 0.04  |
| 4 | 2 | -2 | 1.585 | 58.151 | 0.34  |
| 1 | 3 | 1  | 1.582 | 58.261 | 0.01  |
| 1 | 3 | -3 | 1.579 | 58.406 | 0.05  |
| 4 | 2 | -6 | 1.571 | 58.731 | 0.11  |
| 5 | 1 | -7 | 1.567 | 58.868 | 0.01  |
| 3 | 3 | -3 | 1.563 | 59.070 | 0.03  |
| 6 | 0 | -6 | 1.558 | 59.262 | 0.13  |
| 3 | 3 | -2 | 1.527 | 60.581 | 0.01  |
| 3 | 3 | -4 | 1.522 | 60.794 | 0.04  |
| 6 | 0 | -7 | 1.516 | 61.089 | 0.04  |
| 3 | 1 | 1  | 1.473 | 63.053 | 0.02  |
| 0 | 2 | 4  | 1.466 | 63.406 | 0.21  |
| 3 | 1 | -7 | 1.456 | 63.882 | 0.02  |
| 6 | 0 | -4 | 1.430 | 65.171 | 0.10  |
| 3 | 3 | -1 | 1.430 | 65.193 | 0.02  |
| 3 | 3 | -5 | 1.422 | 65.601 | 0.02  |
| 5 | 1 | -2 | 1.416 | 65.895 | 0.02  |
| 4 | 2 | -1 | 1.416 | 65.936 | 0.01  |
| 6 | 0 | -8 | 1.415 | 65.985 | 0.09  |
| 1 | 3 | 2  | 1.412 | 66.140 | 0.02  |
| 1 | 3 | -4 | 1.408 | 66.342 | 0.02  |
| 4 | 0 | 0  | 1.407 | 66.379 | 0.52  |
| 2 | 2 | 2  | 1.404 | 66.568 | 0.68  |
| 4 | 2 | -7 | 1.400 | 66.746 | 0.03  |
| 5 | 1 | -8 | 1.397 | 66.906 | 0.02  |
| 0 | 0 | 5  | 1.394 | 67.070 | 0.01  |
| 2 | 2 | -6 | 1.394 | 67.106 | 0.89  |
| 4 | 0 | -8 | 1.387 | 67.454 | 0.37  |
| 0 | 4 | 0  | 1.355 | 69.313 | 6.94  |
| 6 | 2 | -6 | 1.351 | 69.548 | 13.69 |
| 2 | 0 | 3  | 1.342 | 70.082 | 0.01  |
| 1 | 1 | 4  | 1.339 | 70.227 | 0.02  |
| 1 | 1 | -6 | 1.334 | 70.555 | 0.02  |
| 2 | 0 | -7 | 1.331 | 70.738 | 0.01  |
| 0 | 4 | 1  | 1.330 | 70.801 | 0.02  |
| 6 | 2 | -5 | 1.329 | 70.838 | 0.06  |

|   |   |     |       |        |      |
|---|---|-----|-------|--------|------|
| 6 | 0 | -3  | 1.303 | 72.478 | 0.03 |
| 3 | 3 | 0   | 1.301 | 72.596 | 0.02 |
| 2 | 4 | -2  | 1.301 | 72.606 | 0.12 |
| 5 | 3 | -5  | 1.299 | 72.740 | 0.02 |
| 7 | 1 | -7  | 1.297 | 72.894 | 0.01 |
| 3 | 3 | -6  | 1.292 | 73.178 | 0.01 |
| 2 | 4 | -1  | 1.280 | 74.002 | 0.02 |
| 5 | 3 | -4  | 1.279 | 74.039 | 0.01 |
| 7 | 1 | -6  | 1.278 | 74.127 | 0.02 |
| 2 | 4 | -3  | 1.278 | 74.130 | 0.01 |
| 5 | 3 | -6  | 1.275 | 74.360 | 0.02 |
| 7 | 1 | -8  | 1.271 | 74.577 | 0.01 |
| 6 | 2 | -4  | 1.265 | 75.035 | 4.51 |
| 0 | 4 | 2   | 1.263 | 75.191 | 4.49 |
| 6 | 2 | -8  | 1.254 | 75.801 | 4.35 |
| 4 | 2 | 0   | 1.249 | 76.172 | 0.05 |
| 3 | 1 | 2   | 1.246 | 76.406 | 0.01 |
| 1 | 3 | 3   | 1.245 | 76.459 | 0.05 |
| 0 | 2 | 5   | 1.240 | 76.825 | 0.01 |
| 4 | 2 | -8  | 1.235 | 77.188 | 0.29 |
| 3 | 1 | -8  | 1.233 | 77.358 | 0.01 |
| 5 | 1 | -9  | 1.232 | 77.372 | 0.05 |
| 5 | 3 | -3  | 1.221 | 78.204 | 0.02 |
| 7 | 1 | -5  | 1.221 | 78.227 | 0.01 |
| 2 | 4 | 0   | 1.221 | 78.262 | 0.08 |
| 2 | 4 | -4  | 1.217 | 78.514 | 0.19 |
| 7 | 1 | -9  | 1.210 | 79.110 | 0.03 |
| 4 | 0 | 1   | 1.205 | 79.449 | 0.03 |
| 2 | 2 | -7  | 1.194 | 80.317 | 0.08 |
| 4 | 4 | -4  | 1.172 | 82.185 | 0.51 |
| 0 | 4 | 3   | 1.170 | 82.327 | 0.01 |
| 6 | 0 | -2  | 1.170 | 82.334 | 0.05 |
| 8 | 0 | -8  | 1.168 | 82.481 | 0.20 |
| 3 | 3 | 1   | 1.168 | 82.542 | 0.01 |
| 0 | 0 | 6   | 1.162 | 83.049 | 1.70 |
| 6 | 2 | -9  | 1.161 | 83.110 | 0.04 |
| 3 | 3 | -7  | 1.159 | 83.289 | 0.01 |
| 4 | 4 | -3  | 1.157 | 83.470 | 0.04 |
| 6 | 0 | -10 | 1.153 | 83.828 | 0.05 |
| 8 | 0 | -9  | 1.150 | 84.138 | 0.04 |
| 7 | 1 | -4  | 1.139 | 85.082 | 0.01 |
| 5 | 3 | -2  | 1.139 | 85.121 | 0.01 |
| 2 | 4 | 1   | 1.137 | 85.271 | 0.01 |
| 2 | 4 | -5  | 1.133 | 85.643 | 0.01 |
| 5 | 3 | -8  | 1.129 | 86.051 | 0.01 |
| 1 | 1 | -7  | 1.126 | 86.343 | 0.04 |
| 7 | 1 | -10 | 1.125 | 86.384 | 0.01 |
| 2 | 0 | -8  | 1.124 | 86.547 | 0.13 |
| 4 | 4 | -2  | 1.113 | 87.557 | 2.65 |
| 8 | 0 | -6  | 1.113 | 87.603 | 1.14 |

|   |   |     |       |        |      |
|---|---|-----|-------|--------|------|
| 4 | 4 | -6  | 1.108 | 88.051 | 2.46 |
| 8 | 0 | -10 | 1.103 | 88.593 | 1.17 |
| 5 | 1 | 0   | 1.102 | 88.673 | 0.01 |
| 4 | 2 | 1   | 1.101 | 88.773 | 0.01 |
| 1 | 3 | 4   | 1.098 | 89.145 | 0.01 |
| 1 | 3 | -6  | 1.095 | 89.454 | 0.01 |

## 1.5 $x = 0.500$

The calculated reflections of the orthorhombic  $\text{Li}_{0.5}\text{BC}$  structure, symmetry space group  $Pnmm$  (No 58) and lattice parameters  $a$ ,  $b$ ,  $c$  equal to 4.582 Å, 6.969 Å, 2.711 Å.

| h | k | l | $d_{hkl}$ | $2\theta$ | $I/I_{max}$ |
|---|---|---|-----------|-----------|-------------|
| 1 | 1 | 0 | 3.829     | 23.212    | 3.22        |
| 2 | 0 | 0 | 3.484     | 25.544    | 100.00      |
| 2 | 1 | 0 | 2.774     | 32.248    | 6.13        |
| 1 | 0 | 1 | 2.527     | 35.499    | 1.45        |
| 0 | 1 | 1 | 2.333     | 38.552    | 6.48        |
| 0 | 2 | 0 | 2.291     | 39.291    | 4.11        |
| 1 | 1 | 1 | 2.213     | 40.746    | 8.21        |
| 1 | 2 | 0 | 2.177     | 41.452    | 2.11        |
| 3 | 1 | 0 | 2.072     | 43.650    | 2.47        |
| 2 | 1 | 1 | 1.939     | 46.819    | 24.91       |
| 2 | 2 | 0 | 1.914     | 47.453    | 13.85       |
| 3 | 0 | 1 | 1.764     | 51.783    | 0.97        |
| 4 | 0 | 0 | 1.742     | 52.481    | 13.27       |
| 1 | 2 | 1 | 1.697     | 53.980    | 2.42        |
| 3 | 1 | 1 | 1.646     | 55.797    | 2.19        |
| 3 | 2 | 0 | 1.631     | 56.357    | 0.73        |
| 4 | 1 | 0 | 1.628     | 56.460    | 3.37        |
| 2 | 2 | 1 | 1.564     | 59.019    | 1.07        |
| 1 | 3 | 0 | 1.492     | 62.165    | 0.39        |
| 3 | 2 | 1 | 1.398     | 66.885    | 0.02        |
| 4 | 1 | 1 | 1.396     | 66.979    | 1.17        |
| 4 | 2 | 0 | 1.387     | 67.482    | 0.68        |
| 0 | 0 | 2 | 1.356     | 69.254    | 7.51        |
| 5 | 1 | 0 | 1.333     | 70.574    | 0.01        |
| 0 | 3 | 1 | 1.331     | 70.736    | 6.33        |
| 1 | 3 | 1 | 1.307     | 72.212    | 12.24       |
| 1 | 1 | 2 | 1.278     | 74.140    | 0.32        |
| 3 | 3 | 0 | 1.276     | 74.250    | 0.26        |
| 2 | 0 | 2 | 1.263     | 75.138    | 5.80        |
| 2 | 3 | 1 | 1.243     | 76.574    | 3.19        |
| 5 | 0 | 1 | 1.240     | 76.840    | 0.15        |
| 4 | 2 | 1 | 1.235     | 77.201    | 1.92        |
| 2 | 1 | 2 | 1.218     | 78.465    | 0.73        |
| 5 | 1 | 1 | 1.197     | 80.145    | 0.46        |
| 5 | 2 | 0 | 1.191     | 80.616    | 0.24        |
| 0 | 2 | 2 | 1.167     | 82.636    | 0.63        |
| 6 | 0 | 0 | 1.161     | 83.090    | 1.03        |
| 3 | 3 | 1 | 1.155     | 83.684    | 7.45        |
| 1 | 2 | 2 | 1.151     | 84.046    | 0.82        |
| 0 | 4 | 0 | 1.146     | 84.505    | 0.01        |
| 3 | 1 | 2 | 1.134     | 85.538    | 0.81        |
| 1 | 4 | 0 | 1.130     | 85.910    | 1.46        |

|   |   |   |       |        |      |
|---|---|---|-------|--------|------|
| 6 | 1 | 0 | 1.126 | 86.342 | 2.09 |
| 2 | 2 | 2 | 1.106 | 88.256 | 4.34 |
| 5 | 2 | 1 | 1.090 | 89.908 | 2.42 |

## 1.6 $x = 0.375$

The calculated reflections of the monoclinic  $\text{Li}_{0.375}\text{BC}$  structure, symmetry space group  $C2/m$  (No 12) and lattice parameters  $a$ ,  $b$ ,  $c$ ,  $\beta$  equal to 9.545 Å, 5.514 Å, 5.202 Å, 97.846°.

| h | k | l  | $d_{hkl}$ | $2\theta$ | $I/I_{max}$ |
|---|---|----|-----------|-----------|-------------|
| 0 | 0 | 1  | 5.154     | 17.192    | 100.00      |
| 1 | 1 | 0  | 4.763     | 18.613    | 0.79        |
| 2 | 0 | 0  | 4.728     | 18.754    | 0.05        |
| 2 | 0 | 1  | 3.748     | 23.719    | 0.01        |
| 1 | 1 | 1  | 3.624     | 24.541    | 0.52        |
| 1 | 1 | -1 | 3.384     | 26.315    | 0.44        |
| 2 | 0 | -1 | 3.269     | 27.260    | 7.01        |
| 0 | 2 | 0  | 2.757     | 32.449    | 0.11        |
| 3 | 1 | 0  | 2.736     | 32.699    | 0.24        |
| 0 | 0 | 2  | 2.577     | 34.786    | 12.99       |
| 3 | 1 | 1  | 2.545     | 35.236    | 0.17        |
| 0 | 2 | 1  | 2.431     | 36.947    | 0.01        |
| 2 | 0 | 2  | 2.405     | 37.365    | 2.47        |
| 2 | 2 | 0  | 2.382     | 37.741    | 20.64       |
| 4 | 0 | 0  | 2.364     | 38.034    | 5.29        |
| 1 | 1 | 2  | 2.335     | 38.530    | 0.29        |
| 3 | 1 | -1 | 2.306     | 39.023    | 0.15        |
| 4 | 0 | 1  | 2.269     | 39.686    | 0.01        |
| 2 | 2 | 1  | 2.221     | 40.589    | 13.45       |
| 1 | 1 | -2 | 2.204     | 40.915    | 0.11        |
| 2 | 0 | -2 | 2.143     | 42.132    | 0.68        |
| 2 | 2 | -1 | 2.107     | 42.878    | 7.97        |
| 4 | 0 | -1 | 2.045     | 44.244    | 12.59       |
| 3 | 1 | 2  | 1.998     | 45.357    | 0.07        |
| 0 | 2 | 2  | 1.883     | 48.306    | 0.36        |
| 4 | 0 | 2  | 1.874     | 48.539    | 6.12        |
| 2 | 2 | 2  | 1.812     | 50.308    | 9.08        |
| 1 | 3 | 0  | 1.804     | 50.547    | 0.13        |
| 4 | 2 | 0  | 1.795     | 50.838    | 0.43        |
| 5 | 1 | 0  | 1.789     | 51.012    | 0.09        |
| 3 | 1 | -2 | 1.774     | 51.471    | 0.05        |
| 5 | 1 | 1  | 1.762     | 51.850    | 0.05        |
| 4 | 2 | 1  | 1.752     | 52.162    | 0.06        |
| 0 | 0 | 3  | 1.718     | 53.281    | 15.60       |
| 1 | 3 | 1  | 1.717     | 53.315    | 0.08        |
| 2 | 2 | -2 | 1.692     | 54.163    | 3.39        |
| 2 | 0 | 3  | 1.690     | 54.219    | 3.14        |
| 1 | 3 | -1 | 1.689     | 54.260    | 0.02        |
| 1 | 1 | 3  | 1.653     | 55.561    | 0.01        |
| 4 | 2 | -1 | 1.643     | 55.928    | 0.28        |
| 4 | 0 | -2 | 1.634     | 56.238    | 0.34        |
| 5 | 1 | -1 | 1.626     | 56.548    | 0.07        |

|   |   |    |       |        |       |
|---|---|----|-------|--------|-------|
| 3 | 3 | 0  | 1.588 | 58.045 | 0.04  |
| 1 | 1 | -3 | 1.582 | 58.288 | 0.05  |
| 6 | 0 | 0  | 1.576 | 58.521 | 0.01  |
| 6 | 0 | 1  | 1.568 | 58.842 | 0.15  |
| 5 | 1 | 2  | 1.567 | 58.874 | 0.03  |
| 4 | 2 | 2  | 1.550 | 59.603 | 2.34  |
| 2 | 0 | -3 | 1.548 | 59.674 | 3.14  |
| 3 | 3 | 1  | 1.548 | 59.700 | 0.09  |
| 3 | 1 | 3  | 1.539 | 60.050 | 0.08  |
| 1 | 3 | 2  | 1.496 | 61.964 | 0.03  |
| 4 | 0 | 3  | 1.490 | 62.270 | 0.06  |
| 3 | 3 | -1 | 1.489 | 62.313 | 0.02  |
| 1 | 3 | -2 | 1.460 | 63.677 | 0.03  |
| 0 | 2 | 3  | 1.458 | 63.784 | 0.48  |
| 6 | 0 | -1 | 1.453 | 64.048 | 0.01  |
| 2 | 2 | 3  | 1.441 | 64.624 | 3.15  |
| 4 | 2 | -2 | 1.406 | 66.446 | 0.11  |
| 3 | 3 | 2  | 1.395 | 67.019 | 0.01  |
| 5 | 1 | -2 | 1.388 | 67.421 | 0.03  |
| 3 | 1 | -3 | 1.383 | 67.693 | 0.06  |
| 0 | 4 | 0  | 1.378 | 67.946 | 10.40 |
| 6 | 2 | 0  | 1.368 | 68.527 | 13.42 |
| 6 | 2 | 1  | 1.363 | 68.822 | 1.26  |
| 2 | 2 | -3 | 1.350 | 69.587 | 0.27  |
| 0 | 4 | 1  | 1.332 | 70.682 | 1.63  |
| 5 | 1 | 3  | 1.328 | 70.927 | 0.05  |
| 2 | 4 | 0  | 1.323 | 71.192 | 0.01  |
| 5 | 3 | 0  | 1.318 | 71.524 | 0.01  |
| 7 | 1 | 1  | 1.314 | 71.792 | 0.03  |
| 3 | 3 | -2 | 1.312 | 71.901 | 0.04  |
| 7 | 1 | 0  | 1.312 | 71.904 | 0.03  |
| 4 | 2 | 3  | 1.311 | 71.990 | 2.18  |
| 4 | 0 | -3 | 1.307 | 72.196 | 0.80  |
| 5 | 3 | 1  | 1.307 | 72.214 | 0.03  |
| 0 | 0 | 4  | 1.288 | 73.433 | 0.15  |
| 6 | 2 | -1 | 1.285 | 73.651 | 6.98  |
| 6 | 2 | 2  | 1.272 | 74.507 | 7.03  |
| 2 | 4 | -1 | 1.270 | 74.667 | 0.49  |
| 6 | 0 | -2 | 1.270 | 74.710 | 0.24  |
| 1 | 1 | 4  | 1.266 | 74.964 | 0.03  |
| 1 | 3 | 3  | 1.261 | 75.329 | 0.01  |
| 6 | 0 | 3  | 1.249 | 76.128 | 0.08  |
| 5 | 3 | -1 | 1.249 | 76.174 | 0.04  |
| 7 | 1 | 2  | 1.237 | 76.999 | 0.03  |
| 7 | 1 | -1 | 1.233 | 77.326 | 0.01  |
| 1 | 3 | -3 | 1.228 | 77.679 | 0.05  |
| 3 | 1 | 4  | 1.223 | 78.086 | 0.02  |
| 1 | 1 | -4 | 1.223 | 78.098 | 0.02  |
| 5 | 3 | 2  | 1.221 | 78.190 | 0.03  |
| 0 | 4 | 2  | 1.215 | 78.652 | 1.40  |

|   |   |    |       |        |      |
|---|---|----|-------|--------|------|
| 3 | 3 | 3  | 1.208 | 79.223 | 0.02 |
| 4 | 0 | 4  | 1.202 | 79.680 | 0.04 |
| 2 | 0 | -4 | 1.202 | 79.696 | 1.32 |
| 2 | 4 | 2  | 1.196 | 80.196 | 0.32 |
| 4 | 4 | 0  | 1.191 | 80.612 | 0.88 |
| 8 | 0 | 0  | 1.182 | 81.340 | 0.25 |
| 4 | 2 | -3 | 1.181 | 81.395 | 2.50 |
| 4 | 4 | 1  | 1.178 | 81.660 | 0.08 |
| 2 | 2 | 4  | 1.167 | 82.582 | 0.60 |
| 0 | 2 | 4  | 1.167 | 82.587 | 0.13 |
| 5 | 1 | -3 | 1.166 | 82.685 | 0.01 |
| 2 | 4 | -2 | 1.159 | 83.276 | 0.19 |
| 6 | 2 | -2 | 1.153 | 83.825 | 0.38 |
| 4 | 4 | -1 | 1.143 | 84.730 | 2.94 |
| 6 | 2 | 3  | 1.138 | 85.203 | 5.01 |
| 8 | 0 | 2  | 1.135 | 85.514 | 2.03 |
| 5 | 3 | -2 | 1.131 | 85.888 | 0.03 |
| 3 | 3 | -3 | 1.128 | 86.140 | 0.03 |
| 8 | 0 | -1 | 1.119 | 86.979 | 1.19 |
| 7 | 1 | 3  | 1.117 | 87.242 | 0.01 |
| 5 | 1 | 4  | 1.116 | 87.291 | 0.01 |
| 3 | 1 | -4 | 1.116 | 87.313 | 0.01 |
| 7 | 1 | -2 | 1.111 | 87.775 | 0.01 |
| 4 | 4 | 2  | 1.110 | 87.845 | 1.75 |
| 4 | 2 | 4  | 1.102 | 88.681 | 0.03 |
| 2 | 2 | -4 | 1.102 | 88.697 | 0.55 |
| 5 | 3 | 3  | 1.097 | 89.168 | 0.01 |
| 6 | 0 | -3 | 1.090 | 89.976 | 0.01 |



## 1.7 $x = 0.250$

The calculated reflections of the monoclinic  $\text{Li}_{0.250}\text{BC}$  structure, symmetry space group  $P2/m$  (No 10) and lattice parameters  $a$ ,  $b$ ,  $c$ ,  $\beta$  equal to 4.752 Å, 2.749 Å, 5.202 Å, 101.580°.

| h | k | l  | $d_{hkl}$ | $2\theta$ | $I/I_{max}$ |
|---|---|----|-----------|-----------|-------------|
| 1 | 0 | 0  | 5.096     | 17.389    | 100.00      |
| 0 | 0 | 1  | 4.655     | 19.048    | 0.19        |
| 1 | 0 | -1 | 3.843     | 23.128    | 0.17        |
| 1 | 0 | 1  | 3.138     | 28.422    | 7.69        |
| 0 | 1 | 0  | 2.749     | 32.544    | 0.44        |
| 2 | 0 | 0  | 2.548     | 35.194    | 16.26       |
| 2 | 0 | -1 | 2.452     | 36.620    | 1.58        |
| 1 | 1 | 0  | 2.419     | 37.129    | 0.16        |
| 0 | 1 | 1  | 2.367     | 37.980    | 23.02       |
| 0 | 0 | 2  | 2.328     | 38.649    | 6.89        |
| 1 | 0 | -2 | 2.299     | 39.154    | 0.02        |
| 1 | 1 | -1 | 2.236     | 40.305    | 11.31       |
| 1 | 1 | 1  | 2.068     | 43.743    | 5.02        |
| 2 | 0 | 1  | 2.067     | 43.757    | 1.57        |
| 1 | 0 | 2  | 1.973     | 45.963    | 7.49        |
| 2 | 0 | -2 | 1.921     | 47.272    | 6.30        |
| 2 | 1 | 0  | 1.869     | 48.686    | 0.69        |
| 2 | 1 | -1 | 1.830     | 49.790    | 6.25        |
| 0 | 1 | 2  | 1.776     | 51.393    | 1.20        |
| 1 | 1 | -2 | 1.764     | 51.798    | 0.29        |
| 3 | 0 | -1 | 1.710     | 53.545    | 4.13        |
| 3 | 0 | 0  | 1.699     | 53.935    | 13.15       |
| 2 | 1 | 1  | 1.652     | 55.579    | 3.22        |
| 1 | 1 | 2  | 1.603     | 57.445    | 0.15        |
| 1 | 0 | -3 | 1.575     | 58.549    | 0.22        |
| 2 | 1 | -2 | 1.575     | 58.567    | 2.36        |
| 2 | 0 | 2  | 1.569     | 58.811    | 0.33        |
| 0 | 0 | 3  | 1.552     | 59.521    | 0.03        |
| 3 | 0 | -2 | 1.526     | 60.647    | 0.41        |
| 3 | 0 | 1  | 1.502     | 61.725    | 2.39        |
| 2 | 0 | -3 | 1.462     | 63.582    | 0.04        |
| 3 | 1 | -1 | 1.452     | 64.076    | 3.03        |
| 3 | 1 | 0  | 1.445     | 64.425    | 0.42        |
| 1 | 0 | 3  | 1.408     | 66.342    | 0.01        |
| 0 | 2 | 0  | 1.375     | 68.165    | 9.15        |
| 1 | 1 | -3 | 1.367     | 68.607    | 0.18        |
| 2 | 1 | 2  | 1.363     | 68.848    | 0.08        |
| 0 | 1 | 3  | 1.351     | 69.500    | 13.27       |
| 3 | 1 | -2 | 1.334     | 70.539    | 1.45        |
| 1 | 2 | 0  | 1.327     | 70.960    | 1.80        |
| 0 | 2 | 1  | 1.318     | 71.508    | 0.03        |
| 3 | 1 | 1  | 1.318     | 71.537    | 0.78        |

|   |   |    |       |        |      |
|---|---|----|-------|--------|------|
| 1 | 2 | -1 | 1.294 | 73.049 | 0.03 |
| 2 | 1 | -3 | 1.291 | 73.268 | 7.54 |
| 3 | 0 | -3 | 1.281 | 73.939 | 0.10 |
| 4 | 0 | 0  | 1.274 | 74.407 | 0.12 |
| 1 | 2 | 1  | 1.259 | 75.440 | 0.66 |
| 3 | 0 | 2  | 1.257 | 75.570 | 0.63 |
| 1 | 1 | 3  | 1.253 | 75.862 | 5.36 |
| 4 | 0 | -2 | 1.226 | 77.851 | 0.01 |
| 2 | 0 | 3  | 1.221 | 78.233 | 0.18 |
| 2 | 2 | 0  | 1.210 | 79.098 | 1.96 |
| 2 | 2 | -1 | 1.199 | 79.948 | 0.16 |
| 1 | 0 | -4 | 1.188 | 80.875 | 0.01 |
| 0 | 2 | 2  | 1.184 | 81.204 | 1.22 |
| 1 | 2 | -2 | 1.180 | 81.525 | 0.08 |
| 4 | 1 | -1 | 1.173 | 82.105 | 0.35 |
| 4 | 0 | 1  | 1.170 | 82.315 | 0.97 |
| 0 | 0 | 4  | 1.164 | 82.879 | 0.50 |
| 3 | 1 | -3 | 1.161 | 83.128 | 5.64 |
| 2 | 0 | -4 | 1.149 | 84.156 | 1.52 |
| 2 | 2 | 1  | 1.145 | 84.594 | 0.46 |
| 3 | 1 | 2  | 1.143 | 84.711 | 3.27 |
| 1 | 2 | 2  | 1.128 | 86.155 | 1.81 |
| 4 | 1 | -2 | 1.120 | 86.937 | 0.09 |
| 2 | 2 | -2 | 1.118 | 87.108 | 1.65 |
| 4 | 0 | -3 | 1.099 | 89.025 | 0.02 |
| 1 | 1 | -4 | 1.090 | 89.910 | 0.02 |
